# Supplementary material for: Plasma Copper Concentration Is Associated with Cardiovascular Mortality in Male Kidney Transplant Recipients
Source: MDPI journal article supplement (doi:10.3390/antiox12020454), 2023-02-10
Supplement: s1 [file s1]

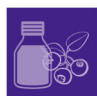

Supplemental material

# Plasma copper concentration is associated with cardiovascular mortality in male kidney transplant recipients

Manuela Yepes-Calderón<sup>1,\*</sup>, Daan Kremer<sup>1</sup>, Adrian Post<sup>1</sup>, Camilo G. Sotomayor<sup>1,2</sup>, Ulrike Seidel<sup>3</sup>, Patricia Huebbe<sup>3</sup>, Tim J. Knobbe<sup>1</sup>, Kai Lüersen<sup>3</sup>, Michele F. Eisenga<sup>1</sup>, Eva Corpeleijn<sup>4</sup>, Martin H. de Borst<sup>1</sup>, Gerjan J. Navis<sup>1</sup>, Gerald Rimbach<sup>3</sup>, Stephan J. L. Bakker<sup>1</sup>

<sup>1</sup> Department of Internal Medicine, Division of Nephrology, University Medical Center Groningen, Groningen, The Netherlands.

<sup>2</sup> Institute of Biomedical Sciences, Faculty of Medicine, University of Chile, Santiago, Chile.

<sup>3</sup> Institute of Human Nutrition and Food Science, University of Kiel, Kiel, Germany.

<sup>4</sup> Department of Epidemiology, University Medical Center Groningen, Groningen, The Netherlands.

\* Correspondence: m.yepes.calderon@umcg.nl; Tel.: +31 061 6654 888

## 1. Table of content.

- **Table S1.** Baseline characteristics of male KTR.....3
- **Table S2.** Baseline characteristics of female KTR. ....5
- **Table S3.** Effect-modification of pre-specified baseline characteristics on the associations of plasma copper concentration with cardiovascular mortality in KTR.....7
- **Table S4.** Association of plasma copper concentration with all-cause mortality, non-cardiovascular mortality and graft failure in KTR.....8
- **Table S5.** Sensitivity analyses of the association of plasma copper concentration with risk of cardiovascular mortality in male KTR, after exclusion of patients according to different criteria.....9

**Table S1.** Baseline characteristics of male KTR.

|                                                     | Tertiles of plasma copper concentration <sup>†</sup> |                     |                     | <i>p</i> <sup>‡</sup> |
|-----------------------------------------------------|------------------------------------------------------|---------------------|---------------------|-----------------------|
|                                                     | Tertile 1                                            | Tertile 2           | Tertile 3           |                       |
| <i>n</i>                                            | 126                                                  | 121                 | 123                 | —                     |
| Plasma copper concentration, µmol/L                 | 12.12 (11.02–12.75)                                  | 14.64 (14.01–15.11) | 17.31 (16.37–18.88) | —                     |
| <b>Demographic and body composition</b>             |                                                      |                     |                     |                       |
| Age, years                                          | 50 ± 13                                              | 54 ± 12             | 55 ± 13             | 0.002                 |
| Caucasian ethnicity, <i>n</i> (%)                   | 124 (98)                                             | 121 (100)           | 123 (100)           | 0.33                  |
| Body mass index, kg/m <sup>2</sup>                  | 25.5 ± 3.7                                           | 26.8 ± 4.3          | 27.0 ± 4.5          | 0.01                  |
| Waist circumference, cms <sup>a</sup>               | 97.5 ± 13                                            | 102 ± 12            | 104 ± 14            | 0.001                 |
| <b>Renal allograft function</b>                     |                                                      |                     |                     |                       |
| eGFR, mL/min/1.73 m <sup>2</sup>                    | 53 ± 20                                              | 52 ± 19             | 54 ± 21             | 0.58                  |
| Proteinuria, <i>n</i> <sup>b</sup> (%) <sup>b</sup> | 31 (25)                                              | 38 (31)             | 32 (26)             | 0.46                  |
| <b>Renal transplant</b>                             |                                                      |                     |                     |                       |
| Preemptive transplantation, <i>n</i> (%)            | 21 (17)                                              | 17 (14)             | 11 (9)              | 0.19                  |
| Dialysis duration before transplantation, months    | 20 (5–49)                                            | 26 (10–51)          | 28 (11–50)          | 0.26                  |
| Living donor, <i>n</i> (%)                          | 48 (38)                                              | 36 (30)             | 43 (35)             | 0.38                  |
| Donor age, years <sup>c</sup>                       | 44 ± 15                                              | 43 ± 16             | 43 ± 16             | 0.69                  |
| Donor sex (male), <i>n</i> (%) <sup>d</sup>         | 55 (44.4)                                            | 54 (45.4)           | 60 (49.6)           | 0.69                  |
| Time since transplantation, years                   | 5.83 (2.35–12.2)                                     | 5.84 (1.73–13.3)    | 5.28 (1.54–9.99)    | 0.73                  |
| <b>Immunosuppressive therapy</b>                    |                                                      |                     |                     |                       |
| Prednisolone use, <i>n</i> (%)                      | 126 (100)                                            | 119 (98)            | 122 (99)            | 0.22                  |
| Calcineurin inhibitor use, <i>n</i> (%)             | 73 (58)                                              | 71 (59)             | 74 (60)             | 0.94                  |
| Proliferation inhibitor use, <i>n</i> (%)           | 98 (78)                                              | 104 (86)            | 105 (85)            | 0.16                  |
| Acute rejection treatment, <i>n</i> (%)             | 39 (31)                                              | 32 (26)             | 41 (33)             | 0.49                  |
| <b>Cardiovascular history</b>                       |                                                      |                     |                     |                       |
| History of cardiovascular disease, <i>n</i> (%)     | 24 (19)                                              | 31 (26)             | 42 (34)             | 0.03                  |
| Previous myocardial infarction, <i>n</i> (%)        | 4 (3)                                                | 7 (6)               | 12 (10)             | 0.10                  |
| Previous cerebrovascular event, <i>n</i> (%)        | 1 (1)                                                | 3 (2)               | 6 (5)               | 0.13                  |
| Previous vascular intervention, <i>n</i> (%)        | 11 (9)                                               | 18 (15)             | 18 (15)             | 0.26                  |
| Systolic blood pressure, mmHg                       | 136 ± 15                                             | 139 ± 17            | 137 ± 17            | 0.43                  |
| Diastolic blood pressure, mmHg-                     | 84 ± 11                                              | 84 ± 11             | 85 ± 10             | 0.61                  |
| Antihypertensive use, <i>n</i> (%)                  | 109 (87)                                             | 113 (93)            | 110 (89)            | 0.20                  |
| Total cholesterol, mmol/L                           | 4.73 ± 0.91                                          | 5.09 ± 1.15         | 5.15 ± 1.13         | 0.004                 |

|                                                           |                    |                     |                      |        |
|-----------------------------------------------------------|--------------------|---------------------|----------------------|--------|
| Low-density lipoprotein-cholesterol, mmol/L <sup>b</sup>  | 2.70 ± 0.75        | 3.01 ± 1.01         | 3.10 ± 0.94          | 0.001  |
| High-density lipoprotein-cholesterol, mmol/L <sup>b</sup> | 1.25 ± 0.41        | 1.30 ± 0.42         | 1.22 ± 0.38          | 0.24   |
| Triglycerides, mmol/L                                     | 1.85 ± 0.91        | 2.02 ± 1.26         | 2.01 ± 1.19          | 0.42   |
| Statin use, <i>n</i> (%)                                  | 67 (53)            | 68 (56)             | 60 (49)              | 0.51   |
| Diabetic subjects, <i>n</i> (%)                           | 19 (15)            | 27 (22)             | 39 (32)              | 0.01   |
| Hemoglobin, mmol/L                                        | 8.41 (1.07)        | 8.41 (1.03)         | 8.41 (1.14)          | 0.99   |
| <b>Inflammation and oxidative stress</b>                  |                    |                     |                      |        |
| Leukocyte count, 10 <sup>9</sup> /L <sup>b</sup>          | 8.05 (6.60–9.55)   | 7.40 (6.40–9.10)    | 7.70 (6.35–9.65)     | 0.34   |
| High-sensitivity C-reactive protein, nmol/L <sup>f</sup>  | 11.02 (4.72–22.03) | 25.18 (12.59–49.57) | 77.11 (25.18–141.63) | <0.001 |
| Plasma malondialdehyde, µmol/L <sup>g</sup>               | 2.57 (2.02–3.54)   | 2.27 (1.78–4.04)    | 2.50 (2.01–4.28)     | 0.41   |
| <b>Lifestyle</b>                                          |                    |                     |                      |        |
| Smoking behavior, <i>n</i> (%) <sup>h</sup>               |                    |                     |                      | 0.76   |
| Current                                                   | 17 (14)            | 17 (14)             | 18 (16)              |        |
| Previous                                                  | 52 (44)            | 60 (50)             | 47 (42)              |        |
| Never                                                     | 49 (42)            | 42 (35)             | 46 (41)              |        |
| Alcohol intake >30g/day, <i>n</i> (%) <sup>i</sup>        | 4 (4)              | 9 (8)               | 9 (8)                | 0.28   |
| SQUASH score, minutes/week × intensity                    | 5805 (2528–7946)   | 6240 (3840–10440)   | 4720 (1320–8610)     | 0.007  |

<sup>π</sup>Tertile 1: <0.86 mg/L. Tertile 2: 0.86–1.00 mg/L, Tertile 3: >1.00 mg/L. <sup>¥</sup>Differences were tested by ANOVA for continuous variables with normal distribution, Kruskal–Wallis test for continuous variables with non-normal distribution and by  $\chi^2$  test for categorical variables. Data available in <sup>a</sup>360, <sup>b</sup>369, <sup>c</sup>363, <sup>d</sup>364, <sup>e</sup>353, <sup>f</sup>350, <sup>g</sup>366, <sup>h</sup>346 and <sup>i</sup>337 KTR. KTR, kidney transplant recipients; eGFR, estimated glomerular filtration rate; SQUASH, Short QUestionnaire to ASsess Health-enhancing physical activity.

Table S2. Baseline characteristics of female KTR.

|                                                  | Tertiles of plasma copper concentration <sup>π</sup> |                     |                     | <i>p</i> <sup>‡</sup> |
|--------------------------------------------------|------------------------------------------------------|---------------------|---------------------|-----------------------|
|                                                  | Tertile 1                                            | Tertile 2           | Tertile 3           |                       |
| <i>n</i>                                         | 97                                                   | 96                  | 97                  | —                     |
| Plasma copper concentration, μmol/L              | 13.69 (13.06–14.64)                                  | 16.68 (16.05–17.31) | 20.46 (19.20–23.60) | —                     |
| <b>Demographic and body composition</b>          |                                                      |                     |                     |                       |
| Age, years                                       | 54 ± 12                                              | 54 ± 13             | 52 ± 14             | 0.57                  |
| Caucasian ethnicity, <i>n</i> (%)                | 97 (100)                                             | 95 (99)             | 97 (100)            | 0.33                  |
| Body mass index, kg/m <sup>2</sup>               | 26.4 ± 4.9                                           | 26.8 ± 5.6          | 27.5 ± 6.1          | 0.33                  |
| Waist circumference, cms <sup>a</sup>            | 93 ± 14                                              | 94 ± 15             | 98 ± 18             | 0.05                  |
| <b>Renal allograft function</b>                  |                                                      |                     |                     |                       |
| eGFR, mL/min/1.73 m <sup>2b</sup>                | 52 ± 21                                              | 50 ± 19             | 48 ± 21             | 0.39                  |
| Proteinuria, <i>n</i> (%)                        | 12 (12)                                              | 18 (19)             | 20 (21)             | 0.28                  |
| <b>Renal transplant</b>                          |                                                      |                     |                     |                       |
| Preemptive transplantation, <i>n</i> (%)         | 17 (18)                                              | 17 (18)             | 20 (21)             | 0.83                  |
| Dialysis duration before transplantation, months | 22 (8–47)                                            | 26 (11–48)          | 22 (8–48)           | 0.73                  |
| Living donor, <i>n</i> (%)                       | 36 (37)                                              | 35 (37)             | 31 (32)             | 0.72                  |
| Donor age, years <sup>c</sup>                    | 44 ± 15                                              | 42 ± 16             | 43 ± 15             | 0.63                  |
| Donor sex (male), <i>n</i> (%) <sup>d</sup>      | 54 (56)                                              | 51 (56)             | 60 (64)             | 0.47                  |
| Time since transplantation, years                | 5.02 (2.15–12.5)                                     | 5.90 (2.72–12.1)    | 4.48 (1.62–12.3)    | 0.52                  |
| <b>Immunosuppressive therapy</b>                 |                                                      |                     |                     |                       |
| Prednisolone use, <i>n</i> (%)                   | 96 (99)                                              | 94 (98)             | 96 (99)             | 0.70                  |
| Calcineurin inhibitor use, <i>n</i> (%)          | 57 (59)                                              | 48 (50)             | 59 (61)             | 0.27                  |
| Proliferation inhibitor use, <i>n</i> (%)        | 81 (84)                                              | 82 (85)             | 79 (81)             | 0.76                  |
| Acute rejection treatment, <i>n</i> (%)          | 16 (17)                                              | 23 (24)             | 22 (23)             | 0.40                  |
| <b>Cardiovascular history</b>                    |                                                      |                     |                     |                       |
| History of cardiovascular disease, <i>n</i> (%)  | 15 (16)                                              | 22 (23)             | 24 (25)             | 0.24                  |
| Previous myocardial infarction, <i>n</i> (%)     | 3 (3)                                                | 3 (3)               | 3 (3)               | 0.99                  |
| Previous cerebrovascular event, <i>n</i> (%)     | 5 (5)                                                | 6 (6)               | 3 (3)               | 0.55                  |
| Previous vascular intervention, <i>n</i> (%)     | 6 (6)                                                | 9 (9)               | 3 (3)               | 0.20                  |
| Systolic blood pressure, mmHg                    | 133 ± 17                                             | 135 ± 20            | 133 ± 19            | 0.80                  |
| Diastolic blood pressure, mmHg-                  | 80 ± 10                                              | 82 ± 12             | 80 ± 10             | 0.33                  |
| Antihypertensive use, <i>n</i> (%)               | 81 (84)                                              | 82 (85)             | 85 (88)             | 0.72                  |
| Total cholesterol, mmol/L                        | 5.22 ± 1.11                                          | 5.35 ± 1.23         | 5.44 ± 1.20         | 0.42                  |

|                                                          |                   |                    |                     |        |
|----------------------------------------------------------|-------------------|--------------------|---------------------|--------|
| Low-density lipoprotein-cholesterol, mmol/L              | 2.95 ± 0.96       | 3.06 ± 0.94        | 3.15 ± 1.02         | 0.36   |
| High-density lipoprotein-cholesterol, mmol/L             | 1.52 ± 0.52       | 1.58 ± 0.50        | 1.56 ± 0.53         | 0.72   |
| Triglycerides, mmol/L                                    | 1.82 ± 0.83       | 1.85 ± 0.85        | 1.98 ± 0.93         | 0.39   |
| Statin use, <i>n</i> (%)                                 | 54 (56)           | 56 (58)            | 46 (47)             | 0.28   |
| Diabetic subjects, <i>n</i> (%)                          | 21 (22)           | 22 (23)            | 28 (29)             | 0.46   |
| Hemoglobin, mmol/L                                       | 8.11 (0.91)       | 7.71 (0.94)        | 7.70 (0.93)         | 0.002  |
| <b>Inflammation and oxidative stress</b>                 |                   |                    |                     |        |
| Leukocyte count, 10 <sup>9</sup> /L <sup>b</sup>         | 7.50 (6.10–9.30)  | 7.10 (5.50–8.93)   | 8.30 (6.60–11.1)    | 0.01   |
| High-sensitivity C-reactive protein, nmol/L <sup>f</sup> | 8.57 (3.81–15.05) | 15.24 (8.57–35.24) | 40.00 (18.57–95.71) | <0.001 |
| Plasma malondialdehyde, µmol/L <sup>b</sup>              | 2.62 (2.07–3.66)  | 2.50 (1.90–3.87)   | 2.64 (1.90–3.61)    | 0.77   |
| <b>Lifestyle</b>                                         |                   |                    |                     |        |
| Smoking behavior, <i>n</i> (%) <sup>h</sup>              |                   |                    |                     | 0.93   |
| Current                                                  | 9 (10)            | 9 (10)             | 8 (9)               |        |
| Previous                                                 | 44 (45)           | 40 (43)            | 42 (45)             |        |
| Never                                                    | 38 (42)           | 45 (48)            | 43 (46)             |        |
| Alcohol intake >30g/day, <i>n</i> (%) <sup>h</sup>       | 3 (3)             | 1 (1)              | 2 (2)               | 0.87   |
| SQUASH score, minutes/week × intensity                   | 5040 (2040–6870)  | 4560 (2130–6611)   | 4560 (1800–6960)    | 0.68   |

<sup>a</sup>Tertile 1: <0.97 mg/L. Tertile 2: 0.97–1.13 mg/L, Tertile 3: >1.13 mg/L. <sup>b</sup>Differences were tested by ANOVA for continuous variables with normal distribution, Kruskal–Wallis test for continuous variables with non-normal distribution and by  $\chi^2$  test for categorical variables. Data available in <sup>a</sup>278, <sup>b</sup>289, <sup>c</sup>279, <sup>d</sup>281, <sup>e</sup>282, <sup>f</sup>274, <sup>g</sup>275 and <sup>h</sup>261 KTR. KTR, kidney transplant recipients; eGFR, estimated glomerular filtration rate; SQUASH, Short QUestionnaire to ASsess Health-enhancing physical activity.

**Table S3.** Effect-modification of pre-specified baseline characteristics on the associations of plasma copper concentration with cardiovascular mortality in KTR.

| <b>Pre-specified potential effect-modifiers</b> | <b><i>p</i> interaction</b> |
|-------------------------------------------------|-----------------------------|
| Sex, male                                       | 0.01                        |
| Body mass index, kg/m <sup>2</sup>              | 0.69                        |
| Systolic blood pressure, mmHg                   | 0.97                        |
| Total cholesterol, mmol/L                       | 0.64                        |
| Low-density lipoprotein-cholesterol, mmol/L     | 0.47                        |
| High-density lipoprotein-cholesterol, mmol/L    | 0.08                        |
| High-sensitivity C-reactive protein, nmol/L     | 0.16                        |
| Leukocyte count, 10 <sup>9</sup> /L             | 0.48                        |

Cox-proportional hazards regression analyses were performed with the inclusion of multiplicative interaction terms. KTR, kidney transplant recipients.

**Table S4.** Association of plasma copper concentration with all-cause mortality, non-cardiovascular mortality and graft failure in KTR.

|                                     | Copper plasma concentration (ln, per 1-SD increase) |           |      |          |           |      |            |           |      |
|-------------------------------------|-----------------------------------------------------|-----------|------|----------|-----------|------|------------|-----------|------|
|                                     | Overall KTR                                         |           |      | Male KTR |           |      | Female KTR |           |      |
|                                     | HR                                                  | 95% CI    | p    | HR       | 95% CI    | p    | HR         | 95% CI    | p    |
| <b>All-cause mortality</b>          |                                                     |           |      |          |           |      |            |           |      |
| Crude                               | 1.16                                                | 0.99–1.37 | 0.07 | 1.39     | 1.08–1.79 | 0.01 | 1.07       | 0.83–1.39 | 0.59 |
| Model 1                             | 1.15                                                | 0.96–1.39 | 0.14 | 1.22     | 0.94–1.58 | 0.13 | 1.09       | 0.83–1.44 | 0.53 |
| Model 2                             | 1.18                                                | 0.99–1.43 | 0.07 | 1.27     | 0.98–1.62 | 0.07 | 1.10       | 0.82–1.46 | 0.53 |
| Model 3                             | 1.16                                                | 0.96–1.39 | 0.12 | 1.27     | 0.99–1.64 | 0.06 | 1.09       | 0.82–1.44 | 0.55 |
| Model 4                             | 1.11                                                | 0.92–1.33 | 0.30 | 1.17     | 0.91–1.50 | 0.22 | 1.04       | 0.78–1.38 | 0.80 |
| Model 5                             | 1.13                                                | 0.95–1.35 | 0.18 | 1.23     | 0.95–1.59 | 0.12 | 1.04       | 0.80–1.36 | 0.76 |
| Model 6                             | 1.12                                                | 0.91–1.38 | 0.27 | 1.15     | 0.87–1.51 | 0.33 | 1.11       | 0.79–1.55 | 0.55 |
| <b>Non-cardiovascular mortality</b> |                                                     |           |      |          |           |      |            |           |      |
| Crude                               | 1.04                                                | 0.84–1.29 | 0.72 | 1.03     | 0.74–1.43 | 0.88 | 1.06       | 0.77–1.44 | 0.74 |
| Model 1                             | 0.98                                                | 0.77–1.24 | 0.85 | 0.88     | 0.64–1.24 | 0.48 | 1.08       | 0.77–1.51 | 0.67 |
| Model 2                             | 1.01                                                | 0.80–1.23 | 0.90 | 0.97     | 0.69–1.36 | 0.85 | 1.07       | 0.75–1.52 | 0.73 |
| Model 3                             | 0.98                                                | 0.78–1.24 | 0.88 | 0.95     | 0.69–1.31 | 0.76 | 1.07       | 0.76–1.51 | 0.69 |
| Model 4                             | 0.95                                                | 0.74–1.20 | 0.65 | 0.87     | 0.63–1.21 | 0.42 | 1.00       | 0.72–1.42 | 0.95 |
| Model 5                             | 0.97                                                | 0.77–1.23 | 0.82 | 0.90     | 0.64–1.27 | 0.55 | 1.06       | 0.76–1.49 | 0.72 |
| Model 6                             | 1.05                                                | 0.80–1.37 | 0.73 | 0.95     | 0.66–1.38 | 0.81 | 1.13       | 0.75–1.70 | 0.57 |
| <b>Graft failure</b>                |                                                     |           |      |          |           |      |            |           |      |
| Crude                               | 0.85                                                | 0.68–1.07 | 0.16 | 0.86     | 0.62–1.18 | 0.35 | 0.82       | 0.58–1.18 | 0.29 |
| Model 1                             | 0.85                                                | 0.67–1.08 | 0.19 | 0.87     | 0.62–1.21 | 0.41 | 0.79       | 0.56–1.11 | 0.17 |
| Model 2                             | 0.84                                                | 0.66–1.07 | 0.15 | 0.93     | 0.66–1.33 | 0.70 | 0.73       | 0.51–1.03 | 0.07 |
| Model 3                             | 0.86                                                | 0.68–1.09 | 0.21 | 0.88     | 0.63–1.22 | 0.44 | 0.77       | 0.54–1.09 | 0.14 |
| Model 4                             | 0.79                                                | 0.61–1.00 | 0.05 | 0.82     | 0.58–1.15 | 0.25 | 0.71       | 0.49–1.02 | 0.06 |
| Model 5                             | 0.82                                                | 0.64–1.04 | 0.09 | 0.84     | 0.60–1.18 | 0.31 | 0.74       | 0.51–1.06 | 0.10 |
| Model 6                             | 0.84                                                | 0.65–1.09 | 0.18 | 0.81     | 0.57–1.16 | 0.25 | 0.80       | 0.54–1.18 | 0.27 |

Model 1: adjustment for age, sex and BMI. Model 2: model 1 + eGFR, time since transplantation and dialysis time before transplantation. Model 3: model 1 + calcineurin inhibitor use, proliferation inhibitor use. Model 4: model 1 + SBP, history of previous cardiovascular disease and hemoglobin.. Model 5: model 1 + total cholesterol, low-density lipoprotein cholesterol, diabetes history. Model 6: model 1 + SQUASH score + high-sensitivity C-reactive protein. KTR, kidney transplant recipients; ln, natural logarithm, SD, standard deviation; HR; hazard ratio; CI, confidence interval; SQUASH, Short QUestionnaire to ASsess Health-enhancing physical activity.



**Supplemental Table 5.** Sensitivity analyses of the association of plasma copper concentration with risk of cardiovascular mortality in male KTR, after exclusion of patients according to different criteria.

|                                                       | Copper plasma concentration (ln, per 1-SD increment) |      |           |          |
|-------------------------------------------------------|------------------------------------------------------|------|-----------|----------|
|                                                       | <i>n</i> events                                      | HR   | 95% CI    | <i>p</i> |
| With eGFR <30 mL/min/1.73 m <sup>2</sup>              | 35                                                   | 2.24 | 1.42–3.55 | 0.001    |
| Who died within the 1 <sup>st</sup> year of follow-up | 30                                                   | 1.74 | 1.10–2.75 | 0.02     |
| Outside -2 and +2 SD of plasma copper concentration   | 30                                                   | 1.83 | 1.19–2.81 | 0.01     |

Cox proportional-hazards regression analyses were performed with adjustment for age and body mass index. KTR, kidney transplant recipients; ln, natural logarithm, SD, standard deviation; HR; hazard ratio; CI, confidence interval; eGFR, estimated glomerular filtration rate.
